# Supplementary material for: Effects on abstinence of nicotine patch treatment before quitting smoking: parallel, two arm, pragmatic randomised trial
Source: PubMed Central journal article supplement (PMC5998048; doi:10.1136/bmj.k2164), 2018-06-13

## Online Appendix

**Table 1 Primary and secondary smoking cessation outcomes presented as odds ratios for preloading arm versus control (primary analysis)\***

| Outcome                          | Unadjusted          |      | Adjusted $\Gamma$   |      | Adjusted $\beta$    |      | Adjusted $\alpha$   |       |
|----------------------------------|---------------------|------|---------------------|------|---------------------|------|---------------------|-------|
|                                  | OR (95%CI)          | p    | OR (95%CI)          | p    | OR (95%CI)          | p    | OR (95%CI)          | p     |
| <b>Primary outcome:</b>          |                     |      |                     |      |                     |      |                     |       |
| 6 month Russell standard         | 1.25 (0.97 to 1.62) | 0.08 | 1.25 (0.97 to 1.62) | 0.08 | 1.26 (0.97 to 1.62) | 0.08 | 1.34 (1.03 to 1.73) | 0.03  |
| <b>Secondary outcomes</b>        |                     |      |                     |      |                     |      |                     |       |
| 4 weeks Russell standard         | 1.21 (1.00 to 1.48) | 0.05 | 1.21 (1.00 to 1.48) | 0.05 | 1.22 (1.00 to 1.48) | 0.05 | 1.32 (1.08 to 1.62) | 0.007 |
| 4 week 7-day point prevalence    | 1.16 (0.95 to 1.41) | 0.15 | 1.16 (0.95 to 1.41) | 0.15 | 1.16 (0.95 to 1.41) | 0.15 | 1.26 (1.03 to 1.54) | 0.03  |
| 6 months 7-day point prevalence  | 1.13 (0.90 to 1.41) | 0.31 | 1.13 (0.90 to 1.41) | 0.31 | 1.14 (0.90 to 1.43) | 0.28 | 1.20 (0.95 to 1.51) | 0.13  |
| 12 months Russell standard       | 1.28 (0.97 to 1.69) | 0.08 | 1.28 (0.97 to 1.69) | 0.08 | 1.27 (0.96 to 1.69) | 0.09 | 1.36 (1.02 to 1.80) | 0.04  |
| 12 months 7-day point prevalence | 1.22 (0.97 to 1.54) | 0.08 | 1.23 (0.97 to 1.54) | 0.08 | 1.22 (0.97 to 1.54) | 0.09 | 1.28 (1.01 to 1.62) | 0.04  |

\*all participants included in the analysis and assumed to be smoking if true status was unknown and the denominators were 893 control arm, 899 intervention arm

$\Gamma$  adjusted for research centre- the primary analysis

$\beta$  adjusted for research centre, previous longest abstinence (days, continuous), baseline strength of urges to smoke (continuous, as per analysis plan)

$\alpha$  adjusted for research centre, previous longest abstinence (days, continuous), baseline strength of urges to smoke (continuous, as per analysis plan), varenicline prescribed +1 week

**Table 2 Reported adverse events of moderate or severe intensity in the intervention and control arms**

| Event                                                 | Control<br>(N = 860) | Intervention<br>(N = 880) | Percentage-point<br>difference (95%CI) |
|-------------------------------------------------------|----------------------|---------------------------|----------------------------------------|
| Gastrointestinal disorders                            | 19 (2.2%)            | 55 (6.2%)                 | 4.0 (2.2 to 5.9)                       |
| Abdominal pain                                        | 3 (0.3%)             | 6 (0.7%)                  | 0.3 (-0.3 to 1.0)                      |
| Diarrhoea                                             | 3 (0.3%)             | 8 (0.9%)                  | 0.6 (-0.2 to 1.3)                      |
| Nausea                                                | 8 (0.9%)             | 30 (3.4%)                 | 2.5 (1.1 to 3.8)                       |
| Vomiting                                              | 3 (0.3%)             | 14 (1.6%)                 | 1.2 (0.3 to 2.2)                       |
| General disorders                                     | 11 (1.2%)            | 30 (3.3%)                 | 2.1 (0.7 to 3.5)                       |
| Asthenia                                              | 5 (0.6%)             | 10 (1.1%)                 | 0.6 (-0.3 to 1.4)                      |
| Fatigue                                               | 0 (0.0%)             | 6 (0.7%)                  | 0.7 (0.1 to 1.2)                       |
| Injuries to poisoning to and procedural complications | 8 (0.9%)             | 4 (0.5%)                  | -0.5 (-1.2 to 0.3)                     |
| Musculoskeletal and connective disorders              | 7 (0.8%)             | 10 (1.1%)                 | 0.3 (-0.6 to 1.2)                      |
| Nervous system                                        | 16 (1.9%)            | 56 (6.4%)                 | 4.5 (2.7 to 6.4)                       |
| Abnormal dreams                                       | 1 (0.1%)             | 9 (1.0%)                  | 0.9 (0.2 to 1.6)                       |
| Dizziness                                             | 6 (0.7%)             | 15 (1.7%)                 | 1.0 (0.0 to 2.0)                       |
| Headache                                              | 3 (0.3%)             | 14 (1.6%)                 | 1.2 (0.3 to 2.2)                       |
| Poor quality sleep                                    | 3 (0.3%)             | 20 (2.3%)                 | 1.9 (0.9 to 3.0)                       |
| Psychiatric                                           | 7 (0.8%)             | 17 (1.9%)                 | 1.1 (0.0 to 2.2)                       |
| Depressed mood                                        | 4 (0.5%)             | 5 (0.6%)                  | 0.1 (-0.6 to 0.8)                      |
| Respiratory                                           | 21 (2.4%)            | 15 (1.7%)                 | -0.7 (-2.1 to 0.6)                     |
| Chest infection                                       | 4 (0.5%)             | 1 (0.1%)                  | -0.3 (-0.8 to 0.2)                     |
| Influenza like illness                                | 3 (0.3%)             | 7 (0.8%)                  | 0.4 (-0.3 to 1.2)                      |
| Nasopharyngitis                                       | 7 (0.8%)             | 4 (0.5%)                  | -0.4 (-1.1 to 0.4)                     |
| Skin and subcutaneous tissue disorders                | 4 (0.5%)             | 7 (0.8%)                  | 0.3 (-0.4 to 1.1)                      |
| Skin irritation                                       | 2 (0.2%)             | 5 (0.6%)                  | 0.3 (-0.3 to 0.9)                      |

Table reports proportion of people reporting adverse events for any system or organ class term with at least 10 or more participants reporting any single event and any preferred term that had at least five participants reporting it. The denominator includes all who participated either at -3 or +1 week.

**Table 3 Serious adverse events**

| <b>Age and gender</b> | <b>Trial arm</b> | <b>Relevant medical history</b>                                          | <b>Event</b>                                                                                       |
|-----------------------|------------------|--------------------------------------------------------------------------|----------------------------------------------------------------------------------------------------|
| 68-year-old man       | Intervention     | Chronic myeloid leukaemia                                                | Hospitalised with chest infection                                                                  |
| 85-year-old woman     | Intervention     | Osteoporosis                                                             | Hospitalised with pelvic fracture following accidental fall                                        |
| 72-year-old woman     | Intervention     | None                                                                     | Hospitalised for aspiration of malignant pleural effusion                                          |
| 65-year old woman     | Intervention     | Cardiovascular disease, hypertension, pacemaker and history of blackouts | Hospitalised for a blackout                                                                        |
| 27-year-old woman     | Intervention     | Psychotic illness, illicit drug use                                      | Hospitalised for psychotic episode following period of illicit drug use leading to anxiety attacks |
| 64-year-old woman     | Intervention     | None                                                                     | Acute coronary syndrome                                                                            |
| 54-year-old woman     | Intervention     | Angina                                                                   | Hospitalised with acute coronary syndrome or non-cardiac chest pain                                |
| 45-year-old woman     | Intervention     | Self-harming                                                             | Hospitalised for increased self-harming and suicidal ideation                                      |
| 68-year-old man       | Control          | Reflux oesophagitis                                                      | Hospitalised with cancer of the oesophagus                                                         |
| 55-year-old woman     | Control          | COPD and type 2 diabetes                                                 | Death due to COPD                                                                                  |
| 59-year-old man       | Control          | Alcohol dependence                                                       | Death due to accidental house fire                                                                 |
| 52-year-old man       | Control          | Two previous hernia repairs                                              | Hospitalised for hernia repair                                                                     |
| 47-year-old woman     | Control          | None                                                                     | Hospitalised for pyelonephritis                                                                    |
| 38-year-old woman     | Control          | Asthma                                                                   | Hospitalised with chest infection                                                                  |
| 64-year-old woman     | Control          | COPD                                                                     | Exacerbation of COPD                                                                               |
| 25-year-old man       | Control          | None                                                                     | Pneumonia                                                                                          |

**Figure 1 Prevalence and severity of symptoms reported in the last 24 hours reported one week into preloading or control**

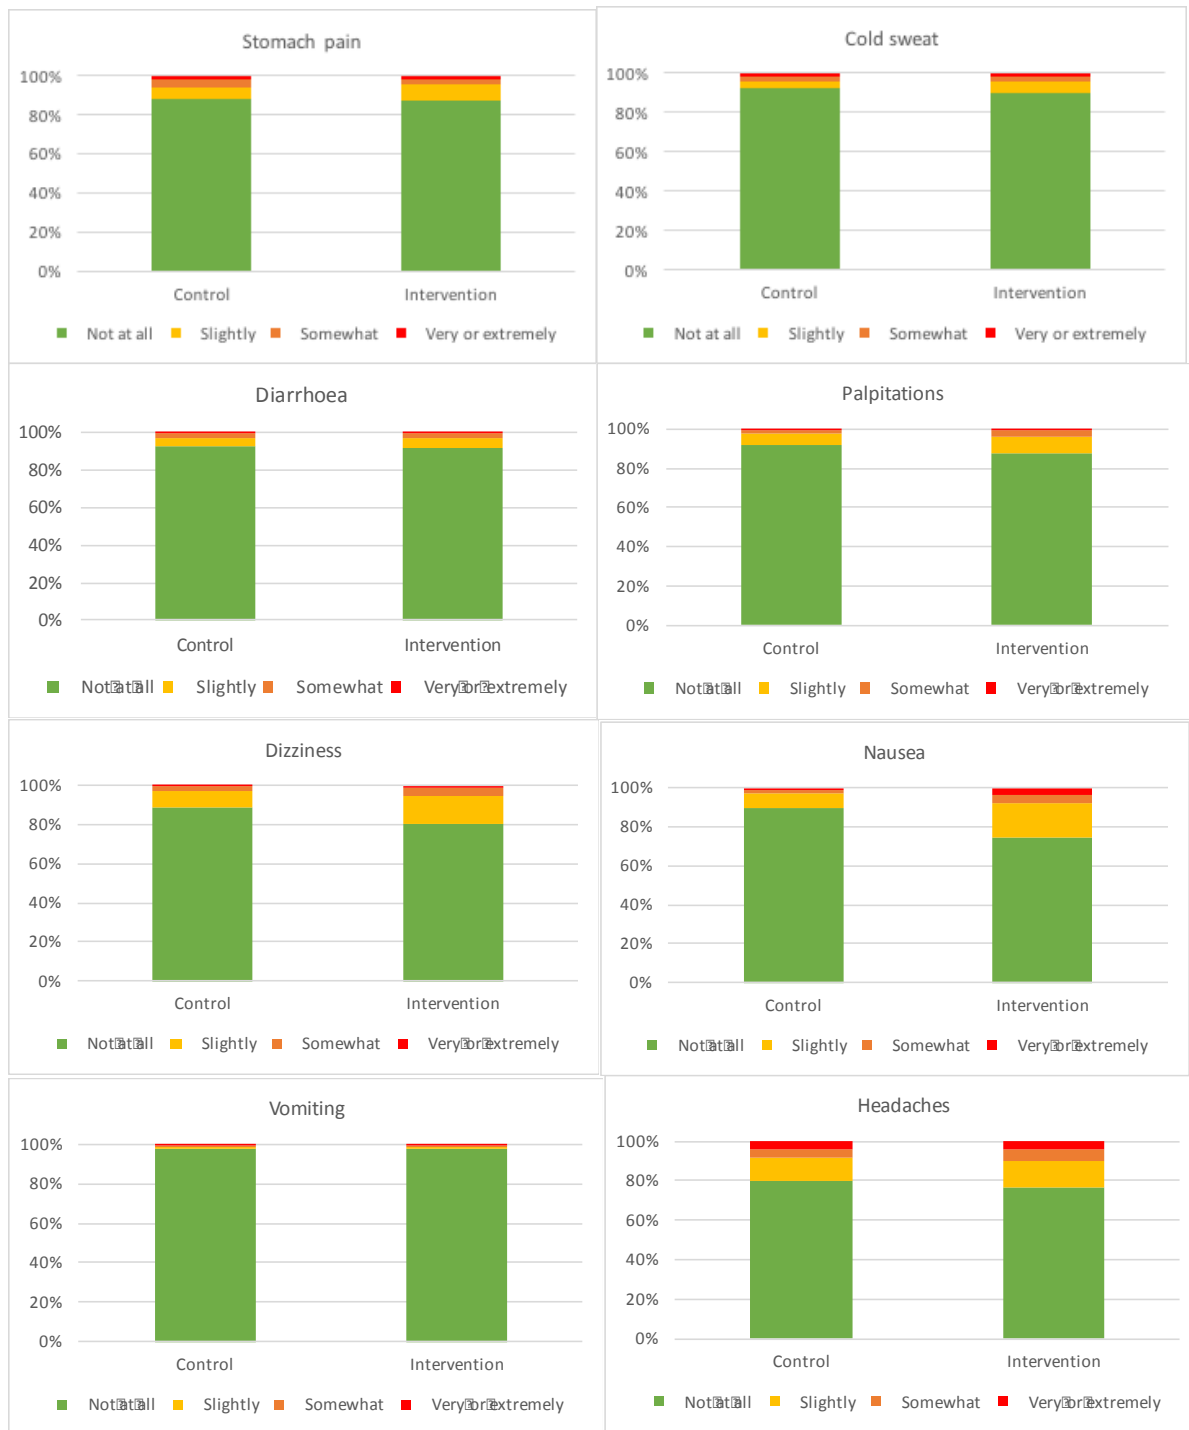

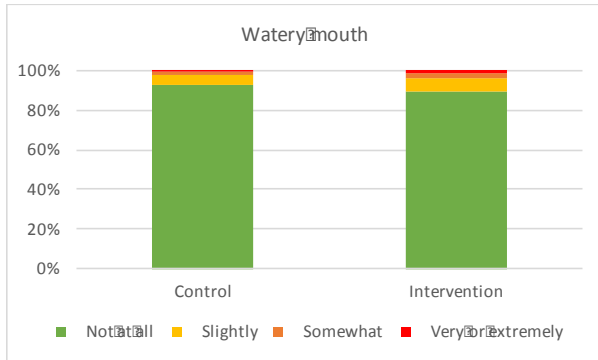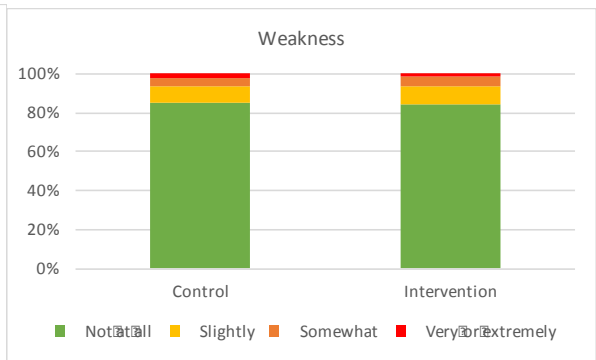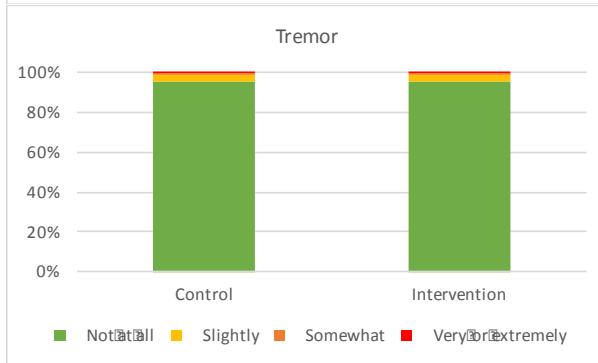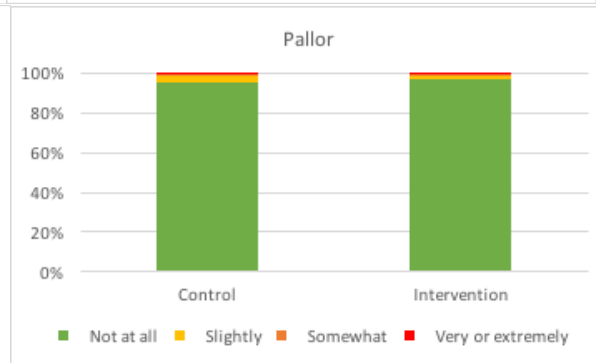

Supplement: avep041696.ww1.pdf [file avep041696.ww1.pdf]
